# Supplementary material for: Development of a robust and efficient virus-induced gene silencing system for reverse genetics in recalcitrant Camellia drupifera capsules
Source: Research Square preprint supplement (doi:10.21203/rs.3.rs-5207025/v1), 2024-12-23
Supplement: Supplementary file 1 [file 8d1de8b7ccdb615dd9f574b1.xlsx]

## Sheet: Sheet1
Supplementary Table 1. Primer’s information
Name	Sequence (5’-> 3’)	Remark
CdPPIL-F	AGCTAAGTTCGCCGATGAGA	Internal reference
CdPPIL-R	CGATCGCCTTCACAACATCC
CdLAC15-VF	AGTGGTCTCTGTCCAGTCCTCGTGCCATCCCAACCGTAG	VIGS-forward
CdLAC15-VR	GGTCTCAGCAGACCACAAGATGATCAATCCCAGCCACCA	VIGS-reverse
CdLAC15-QF	GCGTGTTTGGGGATCGATTT	qRT-PCR
CdLAC15-QR	ATGATCAATCCCAGCCACCA
CdCRY1-VF	AGTGGTCTCTGTCCAGTCCTTGGCTATCCGTTGGTGGATG	VIGS-forward
CdCRY1-VR	GGTCTCAGCAGACCACAAGACTGCCAACCAAGAGCATC	VIGS-reverse
CdCRY1-QF	CGTTGCATTCCCTCCTGACA	qRT-PCR
CdCRY1-QR	TTCGTTGGCACTTCAGCTCT
Note: Nimble Clonig clone universal adaptor sequences are indicated in red
