# Supplementary material for: Development of a robust and efficient virus-induced gene silencing system for reverse genetics in recalcitrant Camellia drupifera capsules
Source: Research Square preprint supplement (doi:10.21203/rs.3.rs-5207025/v1), 2024-12-23
Supplement: Supplementary file 2 [file ffdea31e85305be4807ce10a.xlsx]

## Sheet: Sheet1
Gene	Infiltration approach	capsules developmental phase	Infiltration efficiency (%)	VIGS efficiency (%)
CdCRY1	I	1	6.67 ± 0.64	6.67 ± 5.77
CdCRY1	I	2	6.11 ± 1.18	6.11 ± 5.36
CdCRY1	I	3	50.34 ± 5.06	21.97 ± 7.50
CdCRY1	I	4	50.00 ± 4.55	22.12 ± 6.82
CdCRY1	I	5	56.67 ± 12.41	18.48 ± 8.64
CdCRY1	II	1	NA	NA
CdCRY1	II	2	15.60 ± 3.92	8.10 ± 3.03
CdCRY1	II	3	62.78 ± 6.31	52.78 ± 11.10
CdCRY1	II	4	86.97 ± 15.38	47.31 ± 9.88
CdCRY1	II	5	83.33 ± 11.55	36.67 ± 11.55
CdCRY1	III	1	NA	NA
CdCRY1	III	2	NA	NA
CdCRY1	III	3	83.57 ± 4.70	69.80 ± 3.04
CdCRY1	III	4	93.64 ± 5.53	43.30 ± 2.90
CdCRY1	III	5	90.00 ± 10.00	36.67 ± 5.77
CdCRY1	IV	1	7.87 ± 6.85	0
CdCRY1	IV	2	8.84 ± 6.96	0
CdCRY1	IV	3	18.61 ± 1.77	7.87 ± 0.98
CdCRY1	IV	4	24.09 ± 3.72	0
CdCRY1	IV	5	22.12 ± 7.71	0
CdLAC15	I	2	7.79 ± 3.67	7.79 ± 7.23
CdLAC15	I	3	26.67 ± 2.89	9.72 ± 8.67
CdLAC15	I	4	38.97 ± 15.44	18.77 ± 8.50
CdLAC15	I	5	44.44 ± 10.64	23.74 ± 6.12
CdLAC15	II	1	NA	NA
CdLAC15	II	2	12.96 ± 8.02	5.56 ± 4.81
CdLAC15	II	3	66.28 ± 11.06	33.53 ± 9.13
CdLAC15	II	4	84.63 ± 8.36	72.41 ± 15.42
CdLAC15	II	5	79.80 ± 17.32	76.67 ± 15.28
CdLAC15	III	1	NA	NA
CdLAC15	III	2	NA	NA
CdLAC15	III	3	69.63 ± 16.68	48.52 ± 7.88
CdLAC15	III	4	90.3 ± 0.52	87.27 ± 4.72
CdLAC15	III	5	93.94 ± 5.25	90.91 ± 5.25
CdLAC15	IV	1	6.55 ± 6.27	0
CdLAC15	IV	2	6.11 ± 5.36	0
CdLAC15	IV	3	9.81 ± 1.40	0
CdLAC15	IV	4	10.83 ± 5.30	6.11 ± 1.18
CdLAC15	IV	5	14.14 ± 7.07	6.73 ± 1.43
‘Hongpi’	I	1	5.81 ± 0.54	0
TRV2-w/o
‘Hongpi’	I	3	54.88 ± 0.58	0
TRV2-w/o
‘Hongpi’	I	4	58.89 ± 8.39	0
TRV2-w/o
‘Hongpi’	I	5	46.63 ± 2.96	0
TRV2-w/o
‘Hongpi’	II	1	NA	NA
TRV2-w/o
‘Hongpi’	II	2	7.50 ± 1.77	0
TRV2-w/o
‘Hongpi’	II	3	72.96 ± 14.67	0
TRV2-w/o
‘Hongpi’	II	4	63.03 ± 14.70	0
TRV2-w/o
‘Hongpi’	II	5	74.81 ± 7.14	0
TRV2-w/o
‘Hongpi’	III	1	NA	NA
TRV2-w/o
‘Hongpi’	III	2	NA	NA
TRV2-w/o
‘Hongpi’	III	4	93.33 ± 11.55	0
TRV2-w/o
‘Hongpi’	III	5	84.07 ± 4.49	0
TRV2-w/o
‘Hongpi’	IV	1	5.16 ± 4.51	0
TRV2-w/o
‘Hongpi’	IV	2	5.34 ± 4.64	0
TRV2-w/o
‘Hongpi’	IV	3	10.44 ± 1.17	0
TRV2-w/o
‘Hongpi’	IV	4	13.89 ± 7.35	0
TRV2-w/o
‘Hongpi’	IV	5	15.15 ± 6.43	0
TRV2-w/o
‘Honrou’	I	1	0 ± 0	0
TRV2-w/o
‘Honrou’	I	2	0 ± 0	0
TRV2-w/o
‘Honrou’	I	3	6.94 ± 2.95	0
TRV2-w/o
‘Honrou’	I	4	58.67 ± 7.14	0
TRV2-w/o
‘Honrou’	II	1	NA	NA
TRV2-w/o
‘Honrou’	II	2	7.87 ± 6.85	0
TRV2-w/o
‘Honrou’	II	3	73.06 ± 13.79	0
TRV2-w/o
‘Honrou’	II	4	79.29 ± 11.79	0
TRV2-w/o
‘Honrou’	II	5	58.78 ± 4.45	0
TRV2-w/o
‘Honrou’	III	1	NA	NA
TRV2-w/o
‘Honrou’	III	2	NA	NA
TRV2-w/o
‘Honrou’	III	3	83.64 ± 11.82	0
TRV2-w/o
‘Honrou’	III	4	84.07 ± 4.49	0
TRV2-w/o
‘Honrou’	III	5	85.86 ± 17.23	0
TRV2-w/o
‘Honrou’	IV	1	7.50 ± 6.61	0
TRV2-w/o
‘Honrou’	IV	3	14.54 ± 4.78	0
TRV2-w/o
‘Honrou’	IV	4	17.19 ± 8.99	0
TRV2-w/o
‘Honrou’	IV	5	23.45 ± 3.65	0
TRV2-w/o
Mean 1	3.34	0	15.07	12
Mean 2	4.74	4.45	36.22	47.04
Mean 3	38.11	22.94	49.92	75.57
Mean 4	28.18	46.14	1.57	2.57
Mean 5	22.96	49.51
Range	34.77	49.51	48.35	73
Optimum level		III	3/5
Principal order	III > II > I > IV	CdCRY1:III:3	CdLAC15:III:5
